# Supplementary material for: Oligomerization of dialkylazidogallium compounds: a structural and solution-phase studyElectronic supplementary information (ESI) available: Fig. S1: Mass spectrum of 1 with M+ peak at 225 and higher oligomers present in the vapor phase. See http://www.rsc.org/suppdata/dt/b3/b307813b/
Source: Royal Society of Chemistry journal article supplement (doi:10.1039/b307813b), 2003-01-01
Supplement: b307813b.doc [file b307813b.doc]

Supplemental Figure for J. Chem. Soc. Dalton Trans.

Paper: Oligimerization of Dialkylazidogallium Compounds: A Structural and Solution-Phase Study

Authors: Sean D. Dingman, Nigam P. Rath and William E. Buhro

Manuscript Number: B307813B

**Supplemental Figure**: Mass Spectrum of **1** with M+ peak at 225 and higher oligomers present in the vapor phase.
